# Supplementary material for: Game of Stones: feasibility randomised controlled trial of how to engage men with obesity in text message and incentive interventions for weight loss
Source: PubMed Central journal article supplement (PMC7045214; doi:10.1136/bmjopen-2019-032653), 2020-02-25
Supplement: bmjopen-2019-032653supp001.pdf [file bmjopen-2019-032653supp001.pdf]

**Online supplement 1: Incentive strategy contingent on meeting weight loss targets over 12 months**

|                                       | Money secured | Money lost |
|---------------------------------------|---------------|------------|
| 3 months: £50 – target 5% weight loss |               |            |
| <5%                                   | £0            | £50        |
| ≥5%                                   | £50           | £0         |
| 6 months: £150 – target 10%           |               |            |
| <5%                                   | £0            | £150       |
| 5%                                    | £75           | £75        |
| 6%                                    | £90           | £60        |
| 7%                                    | £105          | £45        |
| 8%                                    | £120          | £30        |
| 9%                                    | £135          | £15        |
| ≥10%                                  | £150          | £0         |
| 12 months: £200 – target 10%          |               |            |
| <5%                                   | £0            | £200       |
| 5%                                    | £100          | £100       |
| 6%                                    | £120          | £80        |
| 7%                                    | £140          | £60        |
| 8%                                    | £160          | £40        |
| 9%                                    | £180          | £20        |
| ≥10%                                  | £200          | £0         |

**Online supplement 2 Intervention engagement over time for narrative texts and study webpage**

|                                | 0-3 months |           | 3-6 months |           | 6-12 months |           |
|--------------------------------|------------|-----------|------------|-----------|-------------|-----------|
|                                | SMS + I    | SMS only  | SMS + I    | SMS only  | SMS + I     | SMS only  |
|                                | N=36       | N=33      | N=36       | N=33      | N=36        | N=33      |
| Replies to texts,<br>count     | 289        | 81        | 10         | 6         | 28          | 11        |
| Replies to texts,<br>mean (SD) | 8.0 (24.2) | 2.5 (7.9) | 0.3 (0.7)  | 0.3 (1.0) | 0.8 (3.3)   | 0.3 (1.0) |
| <b>Text replies, n (%)</b>     |            |           |            |           |             |           |
| 0 replies                      | 21 (58.3)  | 23 (69.7) | 30 (83.3)  | 31 (93.9) | 28 (77.8)   | 28 (84.8) |
| 1-5 replies                    | 9 (25.0)   | 7 (22.3)  | 6 (16.7)   | 2 (6.1)   | 7 (19.4)    | 5 (15.2)  |
| 6-10 replies                   | 2 (5.6)    | 1 (3.0)   | 0 (0.0)    | 0 (0.0)   | 0 (0.0)     | 0 (0.0)   |
| 11-15 replies                  | 0 (0.0)    | 0 (0.0)   | 0 (0.0)    | 0 (0.0)   | 0 (0.0)     | 0 (0.0)   |
| 16-20 replies                  | 1 (2.8)    | 1 (3.0)   | 0 (0.0)    | 0 (0.0)   | 0 (0.0)     | 0 (0.0)   |
| >20 replies                    | 3 (8.3)    | 1 (3.0)   | 0 (0.0)    | 0 (0.0)   | 1 (2.8)     | 0 (0.0)   |

|                                       |         |         |         |         |         |         |
|---------------------------------------|---------|---------|---------|---------|---------|---------|
| Stopping texts, n (%)                 | 1 (2.8) | 2 (6.1) | 3 (8.3) | 3 (9.1) | 1 (2.8) | 1 (3.0) |
| Withdrawal due to texts (self-report) | 2 (5.6) | 2 (6.1) | 0 (0.0) | 0 (0.0) | 0 (0.0) | 0 (0.0) |

**Participants using website self-monitoring features, n (%)**

|              |           |          |          |         |          |         |
|--------------|-----------|----------|----------|---------|----------|---------|
| Weight       | 8 (22.2)  | 5 (15.2) | 6 (16.7) | 3 (9.1) | 4 (11.1) | 3 (9.1) |
| Steps        | 10 (27.8) | 6 (18.2) | 7 (19.4) | 2 (6.1) | 3 (8.3)  | 2 (6.1) |
| Waistline    | 4 (11.1)  | 3 (9.1)  | 3 (8.3)  | 0 (0.0) | 1 (2.8)  | 0 (0.0) |
| Belt notches | 2 (5.6)   | 0 (0.0)  | 2 (5.6)  | 0 (0.0) | 0 (0.0)  | 0 (0.0) |

**Number self-monitoring features used, n (%)**

|      |           |           |           |           |           |           |
|------|-----------|-----------|-----------|-----------|-----------|-----------|
| None | 24 (66.7) | 26 (78.8) | 28 (77.8) | 30 (90.1) | 31 (86.1) | 29 (87.9) |
| One  | 5 (13.9)  | 2 (6.1)   | 2 (5.6)   | 1 (3.1)   | 3 (8.3)   | 3 (9.1)   |
| Two  | 3 (8.3)   | 3 (9.1)   | 3 (8.3)   | 2 (6.1)   | 1 (2.8)   | 1 (3.0)   |

|       |         |         |         |         |         |         |
|-------|---------|---------|---------|---------|---------|---------|
| Three | 3 (8.3) | 2 (6.1) | 2 (5.6) | 0 (0.0) | 1 (2.8) | 0 (0.0) |
| Four  | 1 (2.8) | 0 (0.0) | 1 (2.8) | 0 (0.0) | 0 (0.0) | 0 (0.0) |

**Number of entries on self-monitoring feature, count**

|              |     |     |     |     |     |    |
|--------------|-----|-----|-----|-----|-----|----|
| Weight       | 69  | 115 | 45  | 23  | 42  | 46 |
| Steps        | 419 | 296 | 350 | 102 | 397 | 74 |
| Waistline    | 4   | 7   | 5   | 0   | 2   | 0  |
| Belt notches | 8   | 0   | 4   | 0   | 0   | 0  |

---

*Note.* M = mean, SD = Standard Deviation.

**Online supplement 3 Satisfaction and helpfulness ratings for overall programme and narrative texts at 12 months by deprivation status**

|                                             | SMS+I               |                  | SMS only            |                   | Total               |                   |
|---------------------------------------------|---------------------|------------------|---------------------|-------------------|---------------------|-------------------|
|                                             | SIMD 1, 2<br>(n=14) | SIMD 3+<br>(n=7) | SIMD 1, 2<br>(n=16) | SIMD 3+<br>(n=10) | SIMD 1, 2<br>(n=30) | SIMD 3+<br>(n=17) |
| Satisfaction programme <sup>a</sup>         | 81.8, 21.7          | 79.9, 19.2       | 74.6, 23.5          | 81.0, 16.0        | 77.9, 22.6          | 80.5, 16.8        |
| Helpfulness programme <sup>b</sup>          | 4.2, 1.1            | 3.9, 1.1         | 3.9, 1.1            | 4.2, 1.0          | 4.1, 1.1            | 4.1, 1.0          |
| Helpfulness of narrative texts <sup>b</sup> | 3.4, 1.3            | 3.4, 1.4         | 3.0, 1.5            | 3.8, 1.2          | 3.2, 1.4            | 3.6, 1.3          |

*Note.* All data mean (SD), <sup>a</sup> scored 0-100 (higher = more satisfied), <sup>b</sup> scored 1-5 (1 = low, 5 = high), SIMD = Scottish index of multiple deprivation 1 represents the most disadvantaged area; quintile SIMD 5 represents the least disadvantaged area SMS = Short message service, SMS+I = SMS plus incentive group.
